# Supplementary material for: Natural Killer Cells from Malignant Pleural Effusion Are Endowed with a Decidual-Like Proangiogenic Polarization
Source: PubMed Central journal article supplement (PMC5896269; doi:10.1155/2018/2438598), 2018-03-29

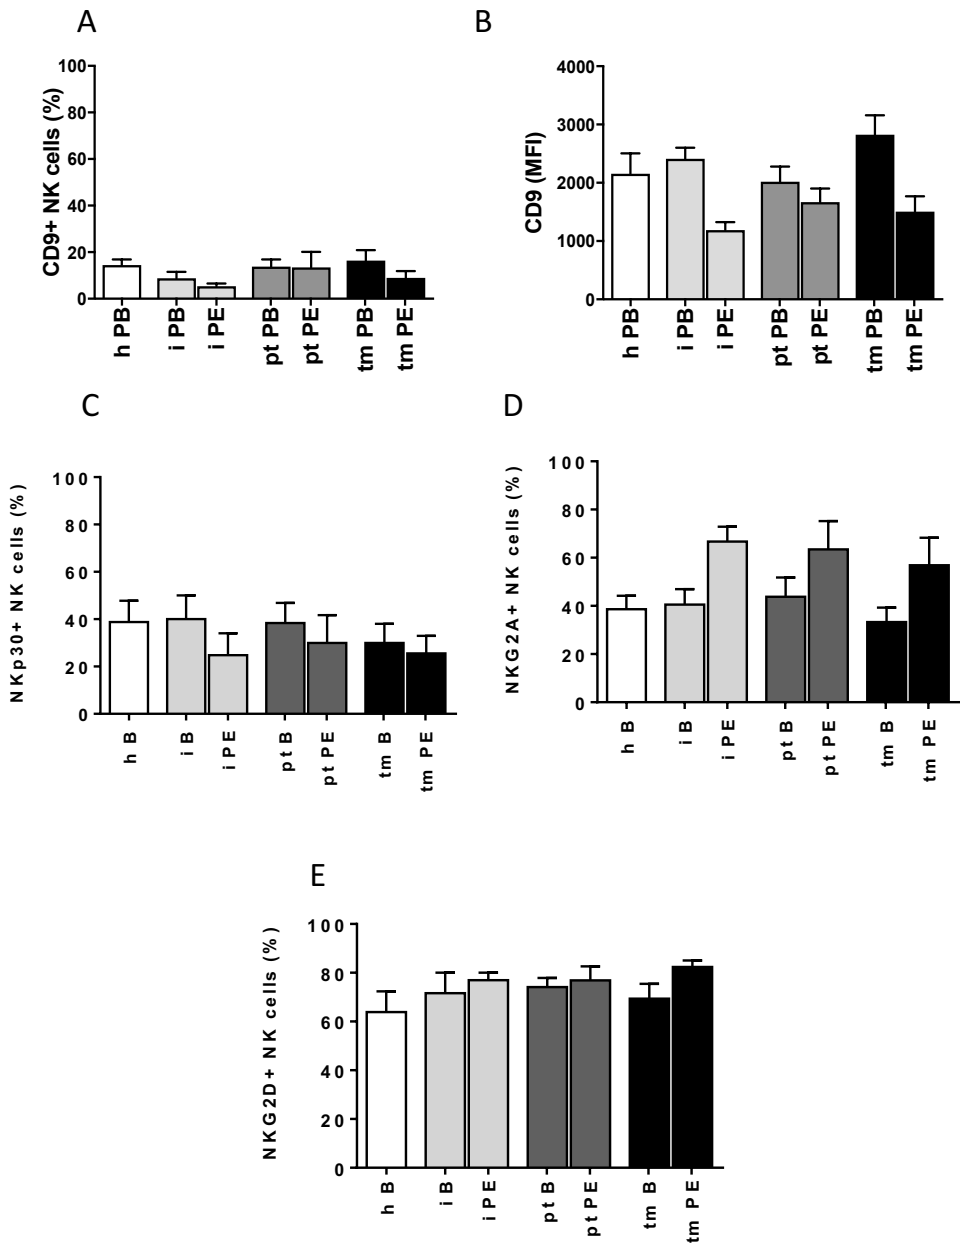

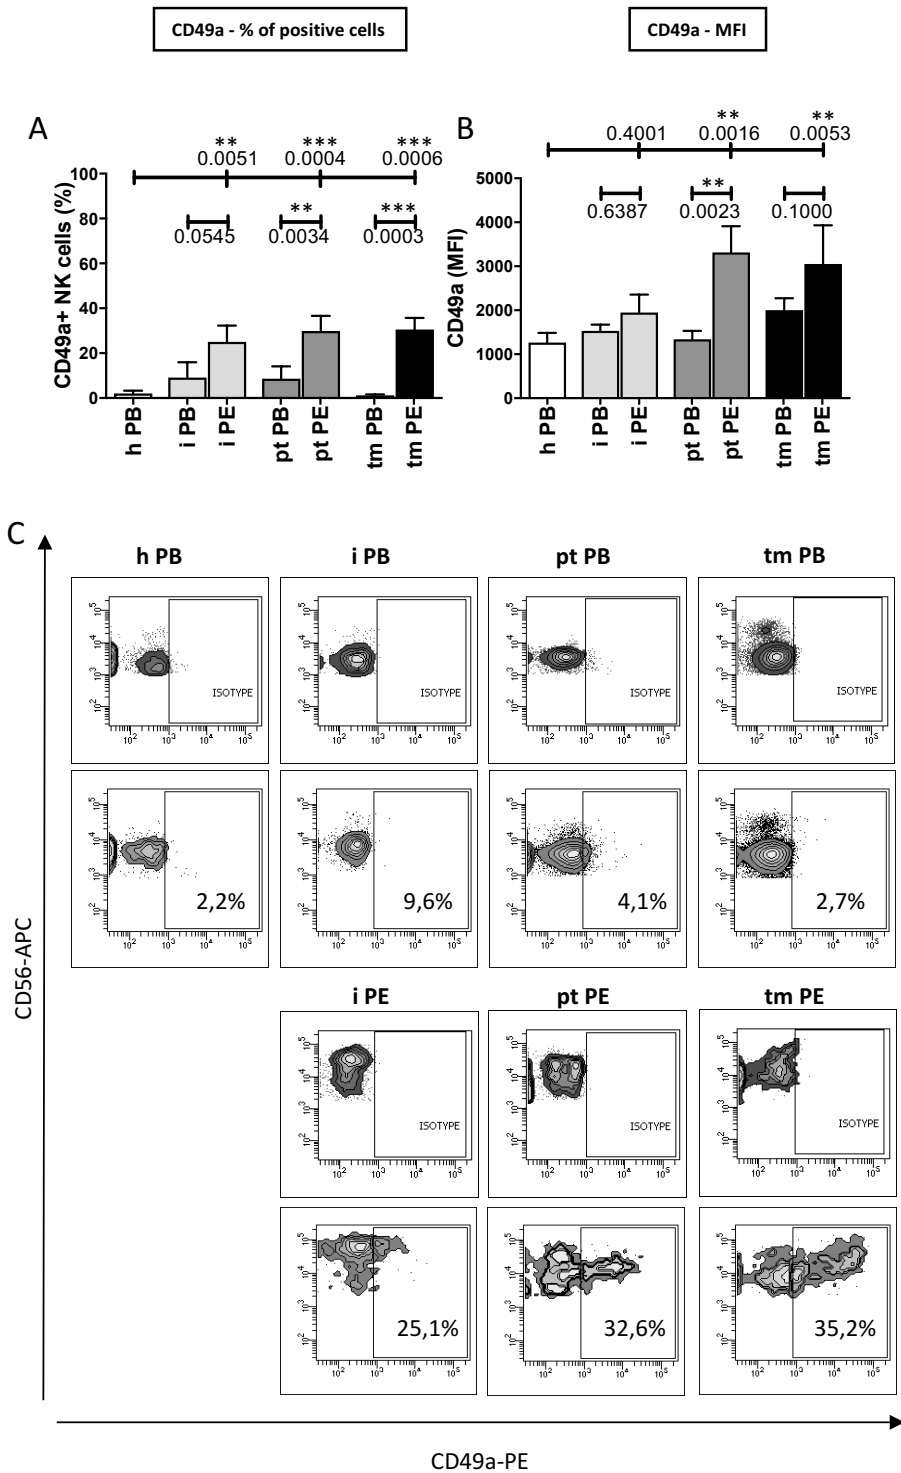

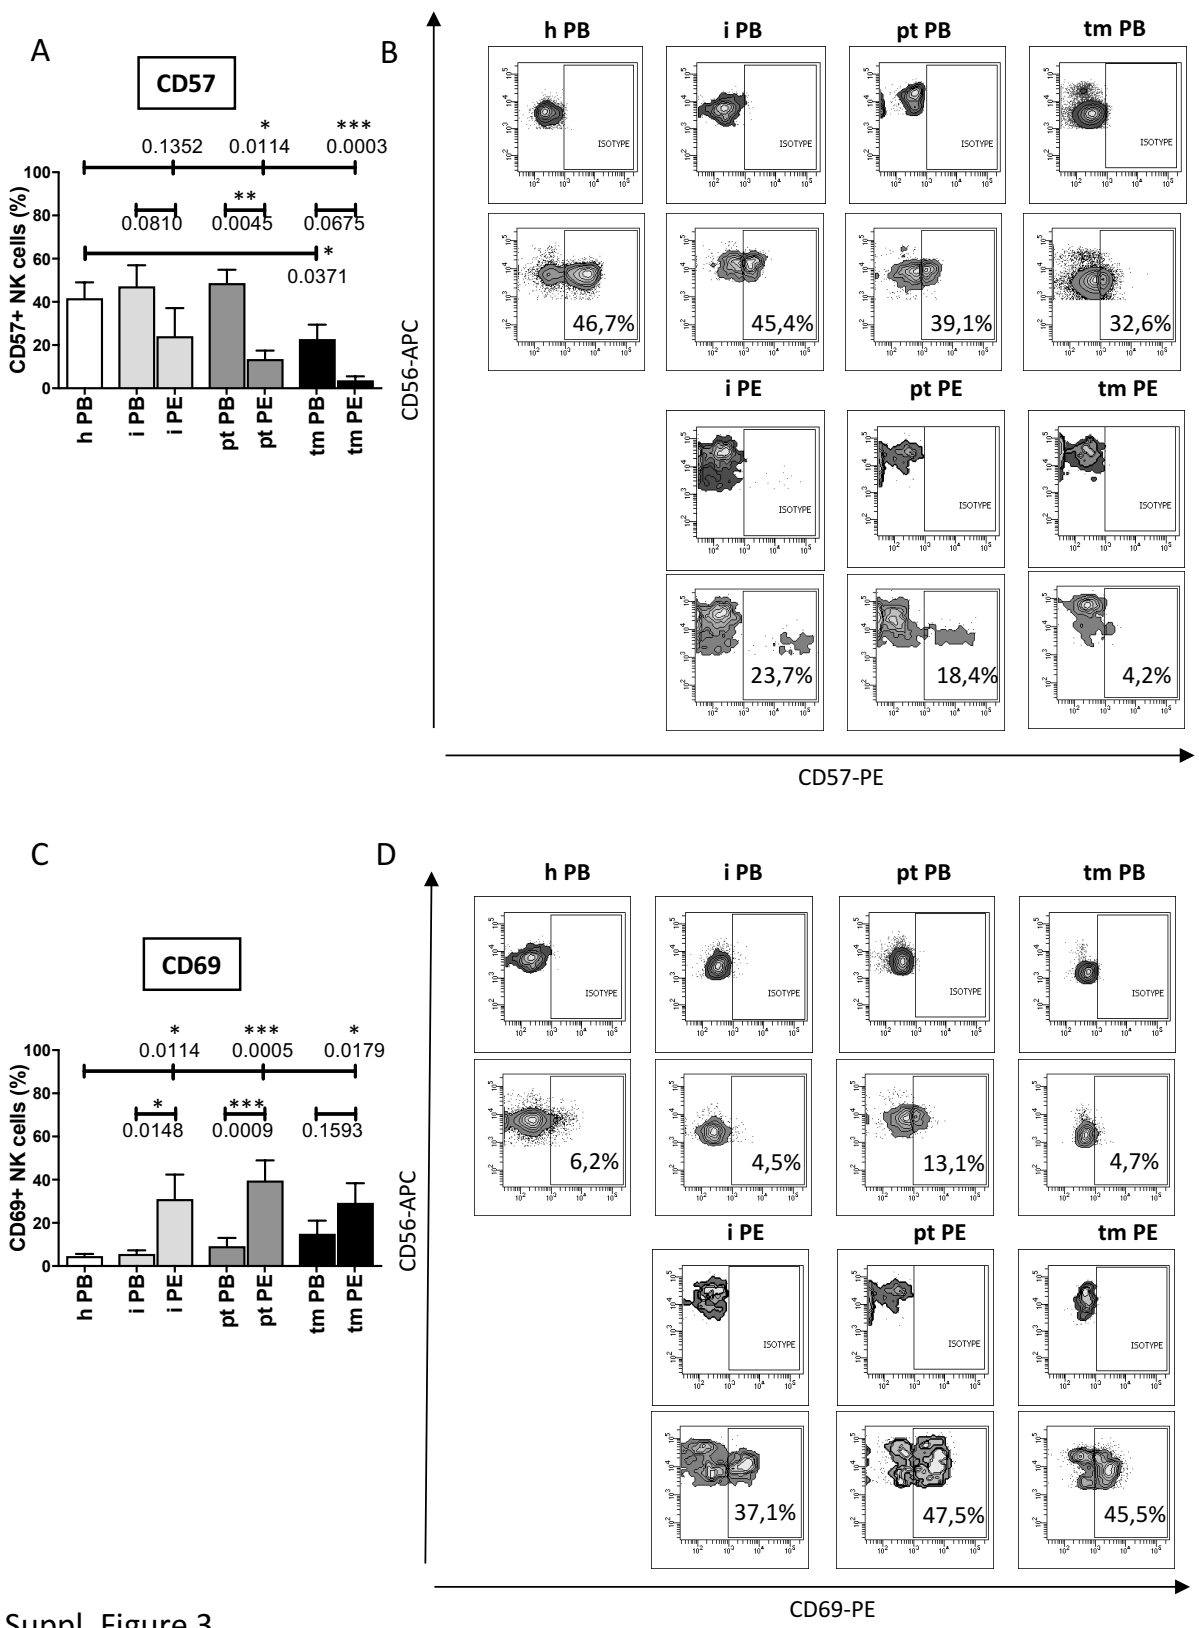

Suppl. Figure 3

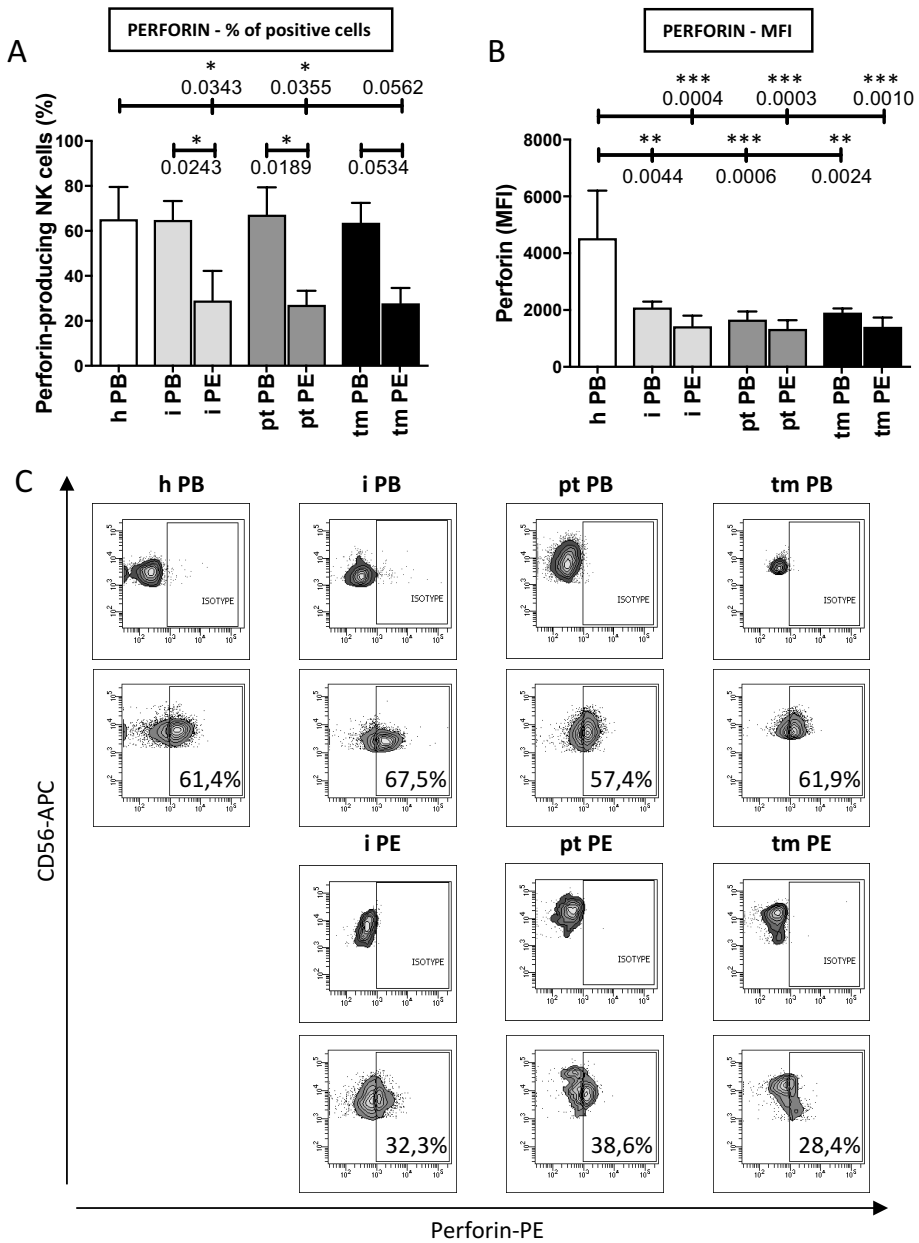

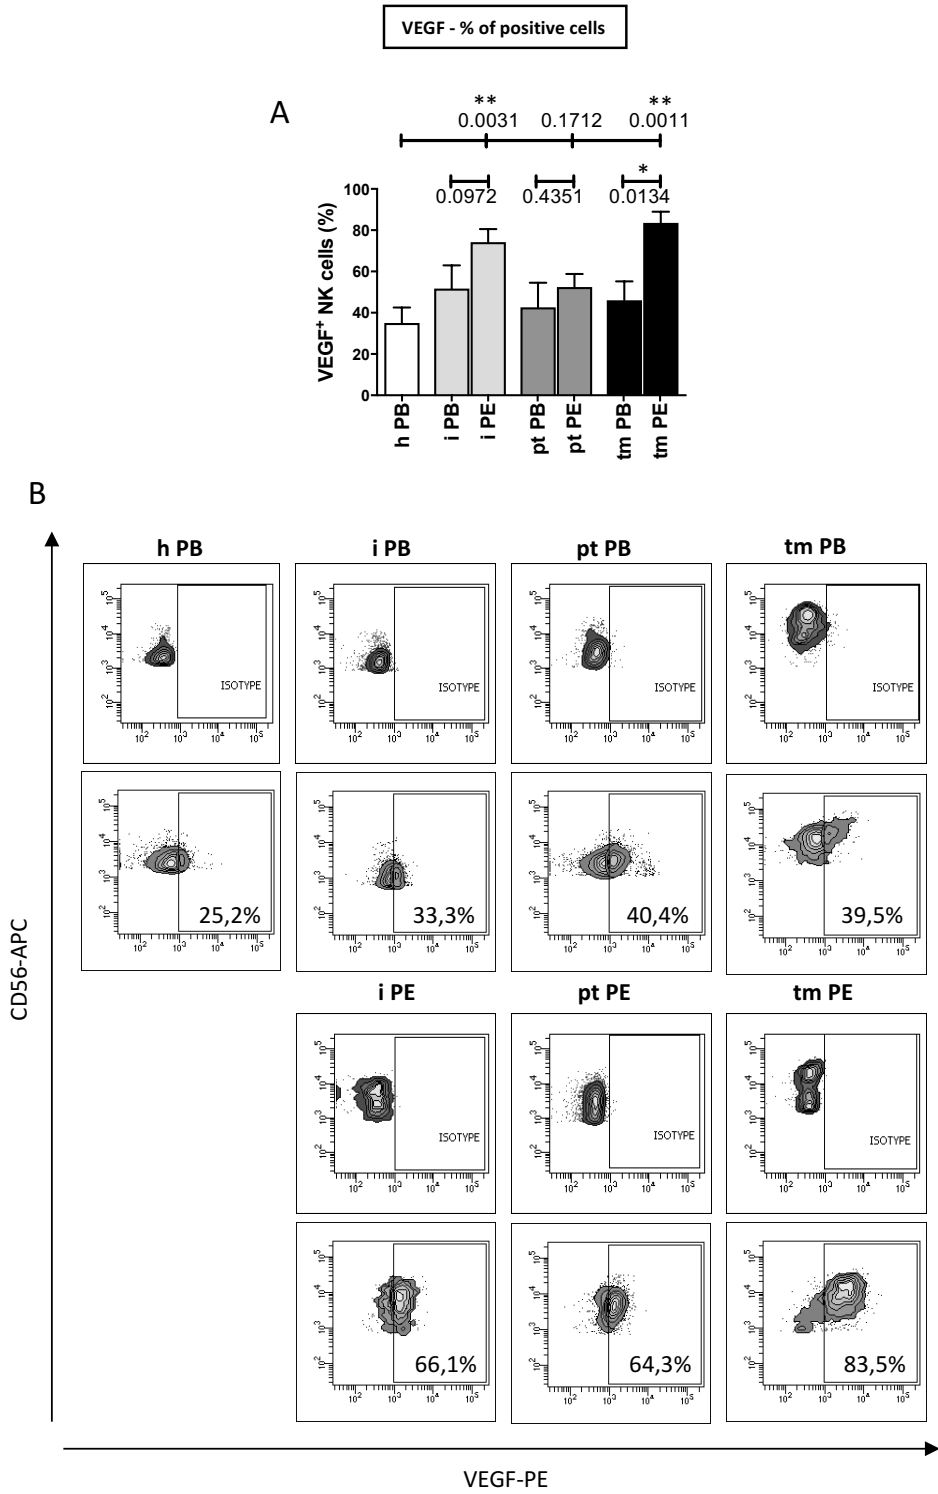

Supplement: 2438598.f1.pdf [file 2438598.f1.pdf]
